# Supplementary material for: Reproduction Modes and Conservation Implications in Three Polyploid Sorbus Stenoendemics in Eastern Slovakia (Central Europe)
Source: MDPI journal article supplement (doi:10.3390/plants12020373), 2023-01-13
Supplement: s1 [file s1]

Supplementary Material Table S1

Survey of seed types recorded in the present study. Ploidy level of mother trees (*Mother*), number of seeds (*Seeds*), inferred ploidy level of embryo (*Embryo*), endosperm (*Endosperm*), egg (*Egg Cell*), and central (*Central Cell*) cells are reported. Embryo (*Embryo Origin*) and endosperm (*Endosperm Origin*) origins are interpreted based on inferred ploidy level of embryo and endosperm. Alternative interpretations are separated with slash mark „/“. Sexual or apomictic seed origin (*Seed Origin*) is indicated. If necessary, explanations are given in a note (*Note*). Unbalanced ploidy level of sperm cells, embryos, and endosperms are marked with „~“. Note that estimation of ploidy level is not precise in the cases of >12x endosperms, because measurement error is higher with increasing ploidy level.

| Mother | Seeds | Embryo | Endosperm | Egg cell | Central Cell | Embryo origin<br>((Egg Cell) +<br>Sperm Cells) | Endosperm Origin ((Central Cell) +<br>Sperm Cell) | Seed origin | Note |
|--------|-------|--------|-----------|----------|--------------|------------------------------------------------|---------------------------------------------------|-------------|------|
| 2x     | 33    | 2x     | 3x        | 1x       | 2x           | (1x) + 1x                                      | (2x) + 1x                                         | sexual      |      |
| 2x     | 1     | 3x     | 4x        | 1x       | 2x           | (1x) + 2x                                      | (2x) + 2x                                         | sexual      |      |
| 3x     | 1     | 3x     | ~6.5x     | 3x       | 6x           | (3x) + 0                                       | (6x) + ~0.5x                                      | apomictic   |      |
| 3x     | 2     | 3x     | 7x        | 3x       | 6x           | (3x) + 0                                       | (6x) + 1x                                         | apomictic   |      |
| 3x     | 1     | 3x     | ~7.5x     | 3x       | 6x           | (3x) + 0                                       | (6x) + ~1.5x                                      | apomictic   |      |
| 3x     | 60    | 3x     | 8x        | 3x       | 6x           | (3x) + 0                                       | (6x) + 1x + 1x / (6x) + 2x                        | apomictic   |      |
| 3x     | 2     | 3x     | ~8.5x     | 3x       | 6x           | (3x) + 0                                       | (6x) + ~1.5x + ~1.5x / (6x) + ~2.5x               | apomictic   |      |
| 3x     | 1     | 3x     | 9x        | 3x       | 6x           | (3x) + 0                                       | (6x) + ~1.5x + ~1.5x / (6x) + 3x                  | apomictic   |      |
| 3x     | 3     | 3x     | ~9.5x     | 3x       | 6x           | (3x) + 0                                       | (6x) + ~1.5x + ~1.5x                              | apomictic   |      |
| 3x     | 16    | 3x     | 10x       | 3x       | 6x           | (3x) + 0                                       | (6x) + 2x + 2x                                    | apomictic   |      |
| 3x     | 1     | 3x     | ~10.5x    | 3x       | 6x           | (3x) + 0                                       | (6x) + ~2.5x + ~2.5x                              | apomictic   |      |
| 3x     | 4     | 3x     | 11x       | 3x       | 6x           | (3x) + 0                                       | (6x) + ~2.5x + ~2.5x                              | apomictic   |      |

| Mother | Seeds | Embryo | Endosperm | Egg cell | Central Cell | Embryo origin<br>((Egg Cell) +<br>Sperm Cells) | Endosperm Origin ((Central Cell) +<br>Sperm Cell) | Seed origin | Note                                                                                                |
|--------|-------|--------|-----------|----------|--------------|------------------------------------------------|---------------------------------------------------|-------------|-----------------------------------------------------------------------------------------------------|
| 4x     | 1     | 2x     | 6x        | 2x       | 4x           | (2x) + 0                                       | (4x) + 1x + 1x / (4x) + 2x                        | apomictic   |                                                                                                     |
| 4x     | 3     | 3x     | 5x        | 2x       | 4x           | (2x) + 1x                                      | (4x) + 1x                                         | sexual      |                                                                                                     |
| 4x     | 1     | ~3.5x  | ~9.5x     | ~3.5x    | 7x           | (~3.5x) + 0                                    | not interpreted                                   | apomictic   | reduced genome size of embryo<br>compared to other 4x embryos                                       |
| 4x     | 1     | ~3.5x  | ~14.5x    | ~3.5x    | 7x           | (~3.5x) + 0                                    | not interpreted                                   | apomictic   | high CV in FCSS measurements, possibly<br>4x embryo                                                 |
| 4x     | 13    | 4x     | 6x        | 2x       | 4x           | (2x) + 2x                                      | (4x) + 2x                                         | sexual      |                                                                                                     |
| 4x     | 1     | 4x     | ~7.5x     | 2x       | 4x           | (2x) + 2x                                      | (4x) + 2x + ~1.5x                                 | sexual      | possibly polyspermy                                                                                 |
| 4x     | 1     | 4x     | ~9.5x     | 4x       | 8x           | (4x) + 0                                       | (8x) + ~1.5x                                      | apomictic   |                                                                                                     |
| 4x     | 38    | 4x     | 10x       | 4x       | 8x           | (4x) + 0                                       | (8x) + 2x                                         | apomictic   |                                                                                                     |
| 4x     | 2     | 4x     | 11x       | 4x       | 8x           | (4x) + 0                                       | (8x) + ~1.5x + ~1.5x                              | apomictic   |                                                                                                     |
| 4x     | 13    | 4x     | ~11.5x    | 4x       | 8x           | (4x) + 0                                       | (8x) + ~1.5x + ~1.5x                              | apomictic   | some of these endosperms may be 12x,<br>because slightly underestimated<br>genome size of endosperm |
| 4x     | 75    | 4x     | 12x       | 4x       | 8x           | (4x) + 0                                       | (8x) + 2x + 2x                                    | apomictic   |                                                                                                     |
| 4x     | 2     | 4x     | ~12.5x    | 4x       | 8x           | (4x) + 0                                       | (8x) + 2x + 2x                                    | apomictic   | these endosperms may be 12x, because<br>slightly overestimated genome size of<br>endosperm          |
| 4x     | 1     | 4x     | 13x       | 4x       | 8x / 12x     | (4x) + 0                                       | (8x) + ~2.5x + ~2.5x / (12x) + 1x                 | apomictic   | possibly trinucleated central cell                                                                  |
| 4x     | 1     | 4x     | ~13.5x    | 4x       | 8x / 12x     | (4x) + 0                                       | (8x) + ~2.5x + ~2.5x / (12x) + ~1.5x              | apomictic   | possibly trinucleated central cell                                                                  |
| 4x     | 3     | 4x     | 14x       | 4x       | 12x          | (4x) + 0                                       | (12x) + 2x                                        | apomictic   | possibly trinucleated central cell                                                                  |

| Mother | Seeds | Embryo | Endosperm | Egg cell | Central Cell | Embryo origin<br>((Egg Cell) +<br>Sperm Cells) | Endosperm Origin ((Central Cell) +<br>Sperm Cell) | Seed origin | Note                                                                                                                                                             |
|--------|-------|--------|-----------|----------|--------------|------------------------------------------------|---------------------------------------------------|-------------|------------------------------------------------------------------------------------------------------------------------------------------------------------------|
| 4x     | 2     | 4x     | ~14.5x    | 4x       | 12x          | (4x) + 0                                       | (12x) + ~2.5x                                     | apomictic   | possibly trinucleated central cell                                                                                                                               |
| 4x     | 9     | 4x     | ~15.5x    | 4x       | 8x / 12x     | (4x) + 0                                       | (2×8x) + 0 / (12x) + 2x + 2x                      | apomictic   | these endosperms may be 16x, because slightly underestimated genome size of endosperm; possibly trinucleated central cell or endopolyploidization of endosperm   |
| 4x     | 5     | 4x     | 16x       | 4x       | 8x / 12x     | (4x) + 0                                       | (2×8x) + 0 / (12x) + 2x + 2x                      | apomictic   | possibly trinucleated central cell or endopolyploidization of endosperm                                                                                          |
| 4x     | 1     | 4x     | ~18.5x    | 4x       | 8x / 16x     | (4x) + 0                                       | (2×8x) + ~1.5x + ~1.5x / (12x) + 2x + 2x          | apomictic   | possibly tetranucleated central cell or endopolyploidization of endosperm                                                                                        |
| 4x     | 1     | 4x     | ~19.5x    | 4x       | 8x / 16x     | (4x) + 0                                       | (2×8x) + ~1.5x + ~1.5x / (12x) + 2x + 2x          | apomictic   | these endosperms may be 20x, because slightly underestimated genome size of endosperm; possibly tetranucleated central cell or endopolyploidization of endosperm |
| 4x     | 1     | 5x     | 13x       | 4x       | 12x          | (4x) + 1                                       | (12x) + 1x                                        | apomictic   | B <sub>III</sub> hybrid, possibly trinucleated central cell                                                                                                      |
| 4x     | 1     | 6x     | ~9.5x     | 4x       | 8x           | (4x) + 2                                       | (8x) + ~1.5x                                      | apomictic   | B <sub>III</sub> hybrid                                                                                                                                          |
| 4x     | 3     | 6x     | 10x       | 4x       | 8x           | (4x) + 2                                       | (8x) + 2x                                         | apomictic   | B <sub>III</sub> hybrid                                                                                                                                          |
| 4x     | 1     | 6x     | 12x       | 4x       | 8x / 12x     | (4x) + 2                                       | (8x) + 2x + 2x / (12x) + 0                        | apomictic   | B <sub>III</sub> hybrid, polyspermy or trinucleated central cell                                                                                                 |
